# Supplementary material
Source: Springer Nature journal article supplement (https://www.springermedizin.de/resource/supplementary/13002_2006_39_MOESM1_ESM.pdf/9627030)
Supplement: MOESM1 [file 9627030]

Additional file 1: List of plants, vernacular names, indigenous uses and distribution.

| Family         | Scientific Name                                | Vernacular Names                                                      | Uses                                                                                                                                                                               | Coll. # | Location     |
|----------------|------------------------------------------------|-----------------------------------------------------------------------|------------------------------------------------------------------------------------------------------------------------------------------------------------------------------------|---------|--------------|
| Aceraceae      | <i>Acer acuminatum</i><br>Wall. ex D.Don       | Firfire, Tilailo<br>(Np)                                              | Juice from wood is employed for gastritis.                                                                                                                                         | D43     | D, H         |
| Amaryllidaceae | <i>Allium wallichii</i> Kuntz                  | Jimnak (Am), Ban lasun (Np)                                           | Decoction of leaves is for indigestion, abdominal pain and applied as tonic.                                                                                                       | D8      | D, H, J, Mus |
| Araceae        | <i>Acorus calamus</i> L.                       | Tsu dak (Am), Sweet flag (Eng), Bojho (Np), Bhadra (Sn)               | Small dried rhizome is used to treat toothache, cough and cold, throat pain. It is also used as appetite stimulant.                                                                | D5      | D, J         |
| Araceae        | <i>Arisaema flavum</i><br>(Forsk.) Schott      | Tanso, Dhawa (Am), Arisaema (Eng), Tinchu (Km), Banko (Np)            | Tubers are insecticidal and anthelmintic in properties. Extract from tuber is taken for scabies, stomachache and swelling. Flower juice is considered for regulating menstruation. | D423    | D, Mus       |
| Araceae        | <i>Arisaema jacquemontii</i><br>Blume          | Dhawa (Am), Dolo (Km), Banko (Np)                                     | Juice from leaves and tubers is anthelmintic in properties. It is used in stomachache, earache and toothache.                                                                      | M14     | D, Mus       |
| Araceae        | <i>Typhonium diversifolium</i> Wall. ex Schoot | Dwa (Am), Ruga sag (Np)                                               | Ingestion of tuber without proper cooking causes pain and swelling of tongue. It is used in stomach pain and cold. Shoots are taken as vegetable.                                  | J80     | D, J         |
| Berberidaceae  | <i>Berberis aristata</i> DC.                   | Kyerwa (Am), Barberry (Eng), Duktser (Km), Chutro (Np), Rasanjan (Sn) | Bark and root decoction is used in jaundice, fever, skin disease, eye disease, headache, diarrhea and dysentery.                                                                   | D18     | D, H         |
| Berberidaceae  | <i>Berberis lycium</i> Royle                   | Kyerwa (Am), Chimma, Dhuk, (Km), Muse chutro (Np)                     | Juice from leaves, fruits and bark is used in eye diseases.                                                                                                                        | M19     | D, Mus       |

|                 |                                                         |                                                                          |                                                                                                                             |      |           |
|-----------------|---------------------------------------------------------|--------------------------------------------------------------------------|-----------------------------------------------------------------------------------------------------------------------------|------|-----------|
| Berberidaceae   | <i>Podophyllum hexandrum</i> Royle                      | Ol me so (Am), Gophal kangadi, Sinmedo, Balagu (Km), Laghupatra (Np, Sn) | Fruit is used in menstrual problems and gynoological disorders. Root paste is taken in worm infection and control bleeding. | J62  | D, J      |
| Betulaceae      | <i>Alnus nepalensis</i> D.Don                           | Ram syang (Am), Alder (Eng), Utis (Np)                                   | Bark juice is used in headache, fever and chest pain.                                                                       | H9   | D, H      |
| Betulaceae      | <i>Betula utilis</i> D.Don                              | Takpa (Am), Birch (Eng), Bhojpatra (Np)                                  | Leaf decoction is used in diuretics. Young bark and shoot juice stops bleeding. Resin is taken in bile disease.             | D788 | D, H, Mus |
| Boraginaceae    | <i>Arnebia benthamii</i> (Wall. ex G.Don) I.M. Johnston | Dimok (Am), Muksi (Km), Maharangi (Np)                                   | Root juice is taken for hair tonic, headache and blood disorders.                                                           | M15  | D, J, Mus |
| Cannabaceae     | <i>Cannabis sativa</i> L.                               | Soma nagpo (Am), Hemp (Eng), Bhango, Ganja (Np), Bhanga (Sn)             | Oil extracted from seed is used in backbone pain, insomnia, gastritis, cold, lymph disorder and pimples.                    | D22  | D, H, J   |
| Caryophyllaceae | <i>Drymaria cordata</i> (L.) Willd. ex Roem. & Schult.  | Lightning weed (Eng), Abijalo (Np)                                       | Root extract is taken in gastritis.                                                                                         | J35  | D, J      |
| Caryophyllaceae | <i>Silene gonosperma</i> (Rupr.) Bocquet.               | Dhumanema, Sugu (Am)                                                     | Leaf and flower paste is used in mental disorder.                                                                           | M73  | D, Mus    |
| Compositae      | <i>Anaphalis triplinervis</i> (Sims) C.B. Clarke        | Taygun, Ganda bata (Am), Buki phul (Np)                                  | Leaf, stem and flower decoction is taken in chest pain.                                                                     | M10  | D, Mus    |
| Compositae      | <i>Arctium lappa</i> L.                                 | Jisung (Am), Great burdock (Eng), Kurro, Tine (Np)                       | Seeds are digestive and used in gall and kidney stone.                                                                      | D12  | D, Mus    |
| Compositae      | <i>Jurinea dolomiaea</i> Bioss.                         | Sila poe (Am), Kalthaple, Dhupjadi (Np)                                  | Root juice is used in diarrhea and stomachache. Plant is used as incense.                                                   | D492 | D, H      |
| Compositae      | <i>Taraxacum officinale</i> F.H. Wigg.                  | Bitterwort (Eng), Gobre phul, Tuknu (Np)                                 | Plant juice is considered to use in insomnia.                                                                               | J76  | D, J      |
| Cupressaceae    | <i>Juniperus indica</i> Bertol.                         | Shug pa, Lha suk (Am), Black juniper (Eng), Dhupi (Np)                   | Juvenile leaf juice controls cough, cold and paralysis. Leaves and branches are burnt for incense. Fruits and               | D46  | D, H, Mus |

|              |                                                  |                                                                                            |                                                                                                                                                                                                             |      |           |
|--------------|--------------------------------------------------|--------------------------------------------------------------------------------------------|-------------------------------------------------------------------------------------------------------------------------------------------------------------------------------------------------------------|------|-----------|
|              |                                                  |                                                                                            | seeds are used in kidney diseases.                                                                                                                                                                          |      |           |
| Cupressaceae | <i>Juniperus squamata</i><br>Buch.-Ham. ex D.Don | Sebaro, Shug pa, Shuk tser, Poma tser (Am), Dhupi (Np)                                     | Paste from young leaf shoot is used in fever and skin disease. Fruits are digestive in function.                                                                                                            | D47  | D, Mus    |
| Elaeagnaceae | <i>Hippophae salicifolia</i><br>D.Don            | Tarbu namtar (Am), Seabuckthorn (Eng), Dalechuk, Torbu, Tora, Chichi (Km, Np), Ashuka (Sn) | Fruit juice is used in swelling of gum, wounds, dysentery, intestinal pain, fever, cough and cold and toothache. Ripe fruit is taken as tonic and appetizer. It is also taken in tuberculosis and diabetes. | D777 | D, J, Mus |
| Elaeagnaceae | <i>Hippophae tibetana</i><br>Schlecht.           | Tarbu satar (Am), Seabuckthorn (Eng), Tirshuk (Km), Dalechuk (Np)                          | Fruits are considered as appetite stimulant.                                                                                                                                                                | D44  | D, Mus    |
| Ephedraceae  | <i>Ephedra gerardiana</i><br>Wall. ex Stapf      | Takwe (Am), Ephedra (Eng), Kagcharo, Tshe (Km), Simtari, Salajari, Somlata (Np), Soma (Sn) | Stem and fruit juice is used in cuts, wounds, altitude sickness, indigestion, diarrhea and bleeding. Plant smoke is taken during eye troubles. Leaf powder is taken to control asthma.                      | D36  | D, Mus    |
| Equisetaceae | <i>Equisetum diffusum</i><br>D.Don               | Chu tshe (Am), Horsetail (Eng), Ukchoe (Km)                                                | Juice from whole plant stops bleeding and relieves chest pain.                                                                                                                                              | M37  | D, Mus    |
| Ericaceae    | <i>Rhododendron anthopogon</i><br>D.Don          | Balukarpo (Am), Balu (Km), Dhup Sunpati, (Np)                                              | Flower is used as herbal tea. It is effective in gastritis, common cold, indigestion and diuretic.                                                                                                          | J67  | D, H, Mus |
| Ericaceae    | <i>Rhododendron arboreum</i><br>Smith            | Balumarpo (Am), Rhododendron (Eng), Laligurans (Np), Rohitaka (San), Kalma (She)           | Flower is used in throat pain, diarrhea, burns and scalds. Young leaf is chewed to get relief from headache. Plant is also used as fish poison.                                                             | H68  | D, H      |
| Gentianaceae | <i>Gentiana nubigena</i><br>Edgew.               | Pangyen ngonpo (Am)                                                                        | Leaf and flower paste is applied in throat pain, chest                                                                                                                                                      | M38  | D, Mus    |

|              |                                             |                                                                      |                                                                                                                                     |      |              |
|--------------|---------------------------------------------|----------------------------------------------------------------------|-------------------------------------------------------------------------------------------------------------------------------------|------|--------------|
|              |                                             |                                                                      | pain, pimples and lung fever.                                                                                                       |      |              |
| Gentianaceae | <i>Gentiana robusta</i> King ex Hook. f.    | Kyiche karpō (Am), Tite (Km, Np)                                     | Paste from leaves and flowers is appetite stimulant and useful in bile disorder and altitude sickness.                              | D39  | D, Mus       |
| Gentianaceae | <i>Swertia nervosa</i> (G.Don) C.B. Clarke  | Tite (Np)                                                            | Plant decoction is used in fever and pneumonia. Young leaf juice is appetite stimulant.                                             | D783 | D, J         |
| Geraniaceae  | <i>Geranium wallichianum</i> D.Don ex Sweet | Ligador (Am), Crane's bill (Eng), Raktamul (Km)                      | Root extract is taken in fever, cough and cold, joint pain, swelling menstrual problem and dysentery.                               | H40  | D, H         |
| Hypocreaceae | <i>Cordyceps sinensis</i> (Berk) Sacc.      | Yar tsa gun bu (Am), Cordyceps (Eng), Jiwanbuti, Yarsagumba (Km, Np) | Whole plant is used as tonic, expectorant and stimulant. It is also used in fever, diarrhea and rheumatism.                         | D26  | D, H, J, Mus |
| Juglandaceae | <i>Juglans regia</i> L.                     | Tar ka (Am), Himalayan walnut (Eng), Okhar (Np), Ashotaka (Sn)       | Bark paste promotes hair growth and is taken to cure arthritis, skin diseases and toothache. Seed coat is taken for healing wounds. | D45  | D, J         |
| Labiatae     | <i>Ajuga lupulina</i> Maxim.                | Zintig (Am), Buggle weed (Eng), Khangsu (Km)                         | Paste from leaves, flowers and fruits is taken for skin disease, fever, sinusitis and epilepsy.                                     | J6   | D, J         |
| Labiatae     | <i>Dracocephalum heterophyllum</i> Benth.   | Jibkar, Tiyangku (Am), Atunmetok (Km)                                | Plant juice is used in liver disorders, fever and toothache.                                                                        | M34  | D, Mus       |
| Labiatae     | <i>Origanum vulgare</i> L.                  | Mag yokpa (Am), Marjoram (Eng), Kair (Km), Ram tulsī (Np)            | Leaf and flower juice is applied in cold and cough, toothache and indigestion.                                                      | J55  | D, J         |
| Labiatae     | <i>Thymus linearis</i> Benth.               | Mak tokpa, Jhisyang, Gnarsing (Am), Ghodamarcha (Km, Np)             | Leaf juice is used in toothache. It is appetite stimulant, and taken as herbal tea.                                                 | D497 | D, H, Mus    |
| Labiatae     | <i>Lamiophlomis rotata</i>                  | Ta pak (Am, Km)                                                      | Plant powder heals damaged                                                                                                          | M50  | D, Mus       |

|               |                                                      |                                                                               |                                                                                                                                                                                                                 |      |                 |
|---------------|------------------------------------------------------|-------------------------------------------------------------------------------|-----------------------------------------------------------------------------------------------------------------------------------------------------------------------------------------------------------------|------|-----------------|
|               | (Benth. ex Hook.f.)<br>Kudo                          |                                                                               | bones, joint pain and sprain.                                                                                                                                                                                   |      |                 |
| Leguminosae   | <i>Caragana gerardiana</i><br>Royle                  | Tanglang, Ji tser,<br>Zomoshing (Am),<br>Thaling (Km)                         | Wood is substitute of<br><i>Santalum album</i> .                                                                                                                                                                | D23  | D, Mus          |
| Leguminosae   | <i>Trigonella emodi</i><br>Benth.                    | Busuhang, Kote<br>(Am)                                                        | Juice of leaf and flower is<br>taken in cough, cuts and<br>wound. Excess consumption<br>induces worm in stomach.                                                                                                | M79  | D, Mus          |
| Liliaceae     | <i>Allium hypsistum</i><br>Stearn                    | Koje, Jim nak,<br>Gokpa (Am),<br>Jimmu (Np)                                   | Leaf juice is used in cough<br>and cold and taken as<br>appetite stimulant.                                                                                                                                     | J7   | H, J, Mus       |
| Liliaceae     | <i>Asparagus filicinus</i><br>Buch.-Ham. ex D.Don    | Nyeshing (Am),<br>Rapuk (Km), Ban<br>kurilo, Satawari<br>(Np)                 | Tubers are used as<br>astringent. Tuber paste is<br>taken in diarrhea, dysentery,<br>fever, cough and cold,<br>lactation and skin disease.<br>Root powder is used as<br>tonic. Fruits are taken for<br>pimples. | D16  | D, J, Mus       |
| Liliaceae     | <i>Paris polyphylla</i> Smith                        | Satuwa (Np)                                                                   | Decoction of root is<br>anthelmintic and antiseptic<br>in properties. Root extract<br>induces wound healing and<br>it acts as antidote of Aconite<br>poisoning.                                                 | D498 | D, H, J         |
| Liliaceae     | <i>Polygonatum<br/>cirrhifolium</i> (Wall.)<br>Royle | Ranye (Am),<br>Solomon's seal<br>(Eng), Kheraulo<br>(Np), Mahamedo<br>(Sn)    | Root juice is used as tonic<br>and is taken in fractures.                                                                                                                                                       | D63  | D, Mus          |
| Morchellaceae | <i>Morchella conica</i> (L.)<br>Pers.                | Morel (Eng),<br>Mathyaura (Km),<br>Guchi chyau (Np)                           | Plant is taken as vegetable. It<br>is also considered as tonic<br>and used in fever.                                                                                                                            | D52  | D, H, J         |
| Orchidaceae   | <i>Dactylorhiza hatagirea</i><br>(D.Don) Soo         | Wang lak (Am),<br>Lovha (Km),<br>Hathejadi,<br>Panchaule (Np),<br>Airalu (Sn) | Juice from rhizome is taken<br>in cuts, wounds and gastritis.                                                                                                                                                   | D31  | D, H, J,<br>Mus |
| Orchidaceae   | <i>Malaxis muscifera</i><br>(Lindl) Kuntze           | Wongril (Am),<br>Rakpo (Km)                                                   | Rhizome is tonic in nature.                                                                                                                                                                                     | M51  | D, Mus          |

|               |                                                 |                                                                                                            |                                                                                                                                                                                                          |      |              |
|---------------|-------------------------------------------------|------------------------------------------------------------------------------------------------------------|----------------------------------------------------------------------------------------------------------------------------------------------------------------------------------------------------------|------|--------------|
| Papaveraceae  | <i>Corydalis cashmeriana</i><br>Royle           | Tongri zilpa (Am),<br>Ye khi (Km)                                                                          | Leaf and flower juice is applied in fever and jaundice.                                                                                                                                                  | M28  | D, Mus       |
| Papaveraceae  | <i>Corydalis megacalyx</i><br>Ludlow            | Tongzil, Tongri serpo (Am),<br>Rekon, Sikya (Km)                                                           | Plant paste is used in fever, liver trouble, jaundice, ulcer and blood purification.                                                                                                                     | M29  | D, Mus       |
| Parnassiaceae | <i>Parnassia nubicola</i><br>Wall.              | Jeje lakpa (Am),<br>Mamira, Nirmasi,<br>Bismaro (Np)                                                       | Leaf juice is applied to treat eye problems, wounds and inflammation.                                                                                                                                    | D746 | D, H         |
| Pinaceae      | <i>Cedrus deodara</i> (Roxb.<br>ex D.Don) G.Don | Himalayan cedar (Eng), Dyar,<br>Debdar (Np),<br>Suradaru (San)                                             | Wood oil is used in skin disease and scabies. It is also used as antilice and antileech. The bark decoction is for fever, diarrhea and dysentery. Leaf extract is massaged to get relief from body pain. | D24  | D, J         |
| Pinaceae      | <i>Pinus wallichiana</i> A.B.<br>Jackson        | Thesing, Doma (Am), Blue pine (Eng), Gobre salla (Np)                                                      | Resin is employed to treat stomachache and body pain. It is also used to cure snakebite.                                                                                                                 | D60  | D, H         |
| Polygonaceae  | <i>Aconogonum molle</i><br>(D.Don) Hara         | Nyalowa (Am),<br>Smart weed (Eng),<br>Chawanle, Thotne (Km, Np)                                            | Extract of leaves and stem is taken for intestinal pain.                                                                                                                                                 | D4   | D, H         |
| Polygonaceae  | <i>Oxyria digyna</i> (L.) Hill                  | Chuma tsi (Am),<br>Mountain sorrel (Eng), Kyurmu (Km), Rakte bujo (Np)                                     | Leaf and flower juice is useful in dysentery.                                                                                                                                                            | M56  | D, Mus       |
| Polygonaceae  | <i>Rheum australe</i> D.Don                     | Chu tsa (Am),<br>Himalayan rhubarb (Eng),<br>Tarbu atar, Late chuk, Akchya, Mire chuk (Km), Padamchal (Np) | Root paste is applied in sprain and fractures. It is taken in chest pain, cough and cold, diarrhea, dysentery and swelling. Leaves and petiole are anthelmintic and appetite stimulant.                  | D702 | D, H, J, Mus |

|               |                                                         |                                                                         |                                                                                                                                                     |      |           |
|---------------|---------------------------------------------------------|-------------------------------------------------------------------------|-----------------------------------------------------------------------------------------------------------------------------------------------------|------|-----------|
| Polygonaceae  | <i>Rumex nepalensis</i><br>Spreng.                      | Lung sho (Am),<br>Sheep sorrel<br>(Eng), Shoma<br>(Km), Halhale<br>(Np) | Root paste cures joint injury<br>and fractures. Seeds are<br>useful in mouth disorders.<br>Shoot extract is taken in<br>constipation and sores.     | D71  | D, H, Mus |
| Primulaceae   | <i>Androsace strigillosa</i><br>Franch.                 | Gyatik nakpo<br>(Am), Metok (Km)                                        | Leaves and flower juice is<br>applied in fever and body<br>swelling.                                                                                | M11  | D, Mus    |
| Primulaceae   | <i>Primula sikkimensis</i><br>Hook. f.                  | Sangdil karmo<br>(Am), Syaule<br>(Km)                                   | Flower juice is used in fever,<br>blood disorders and<br>diarrhea.                                                                                  | M64  | D, Mus    |
| Ranunculaceae | <i>Aconitum bisma</i><br>(Buch.-Ham) Rapaics            | Bong nak (Am),<br>Aconite (Eng),<br>Dug (Km),<br>Bikhma (Np)            | Dried root for nausea and<br>vomiting, fever, stomach<br>disorder, antidote to<br>poisoning,                                                        | H2   | H, J      |
| Ranunculaceae | <i>Aconitum ferox</i> Wall.<br>ex Seringe               | Aconite (Eng),<br>Bikh (Np),<br>Vatsanaba (Sn)                          | Root extract is used in<br>leprosy, fever and cholera.                                                                                              | H3   | D, H      |
| Ranunculaceae | <i>Clematis tibetana</i><br>Kuntze                      | Imong nak po<br>(Am), Jhujukul<br>(Km)                                  | Paste from leaves, stem and<br>flowers is used in wound,<br>cough, cold and joint pain.                                                             | M25  | D, Mus    |
| Ranunculaceae | <i>Delphinium himalayai</i><br>Munz.                    | Atik, Atimyue<br>(Am, Km), Atis<br>(Np)                                 | Root is useful in astringent.<br>Root juice is taken in<br>snakebite, cough, fever, liver<br>problems and headache.                                 | D468 | D, H, J   |
| Rosaceae      | <i>Cotoneaster<br/>microphyllus</i> Wall. ex<br>Lindley | Tsar leb (Am),<br>Tsharin (Km),<br>Mase, Pate (Np)                      | Fruit controls menstruation<br>and bleeding.                                                                                                        | D30  | D, Mus    |
| Rosaceae      | <i>Princepia utilis</i> Royle                           | Dhatelo (Np),<br>Yormang (She)                                          | Seed oil is used in<br>rheumatism, dysentery, fever<br>and muscular pain.                                                                           | D65  | D, H      |
| Rosaceae      | <i>Rosa macrophylla</i><br>Lindley                      | Segoe fo (Am),<br>Amdoga, Kesar<br>(Km), Gulaf (Np)                     | Stem and fruit paste is taken<br>in fever and diarrhea.                                                                                             | D69  | D, Mus    |
| Rutaceae      | <i>Zanthoxylum armatum</i><br>DC.                       | Nepal pepper<br>(Eng), Timur<br>(Np), Tejswani<br>(Sn)                  | Seeds is powdered and taken<br>for liver problems. Fruits are<br>appetite stimulant. Fruits<br>and barks are taken in<br>indigestion and toothache. | D84  | D, J      |
| Saxifragaceae | <i>Astilbe rivularis</i> Buch.-<br>Ham. ex D.Don        | Tholo okhti (Np)                                                        | Decoction of root is taken in<br>dysentery.                                                                                                         | H17  | D, H, J   |

|                  |                                                      |                                                                                                            |                                                                                                                                                                             |      |           |
|------------------|------------------------------------------------------|------------------------------------------------------------------------------------------------------------|-----------------------------------------------------------------------------------------------------------------------------------------------------------------------------|------|-----------|
| Saxifragaceae    | <i>Bergenia ciliata</i> (Haw.) Sternb.               | Gatik mukpo, Gadur (Am), Rock foil (Eng), Simtadi, Silpari, Dhungephul (Km), Pakhanved (Np), Asamaved (Sn) | Root decoction is taken in diarrhea, dysentery, fever and respiratory problems. It maintains the irregular menstrual cycle. It is also used as antiemetic and anthelmintic. | D20  | D, H, J   |
| Scrophulariaceae | <i>Lagotis kunawurensis</i> (Royle ex Benth.) Rupr.  | Ba sha ka (Am), Tikta (Km, Np)                                                                             | Leaf and root juice is taken in high blood pressure, blood vomiting, haematopsis and haematuria.                                                                            | M49  | D, Mus    |
| Scrophulariaceae | <i>Neopicrorhiza scrophulariiflora</i> (Pennel) Hong | Hong len (Am), Katuko, Tikta (Km), Kutki (Np), Katuka (Sn)                                                 | Root paste is used in fever, gastritis, intestinal pain, cough and cold, headache, eye problem and bile disorders.                                                          | D502 | D, H      |
| Scrophulariaceae | <i>Pedicularis longiflora</i> Rudolph                | Langna serpo, Lugru (Am, Km)                                                                               | Whole plant extract dries up lymph fluid.                                                                                                                                   | M59  | D, Mus    |
| Scrophulariaceae | <i>Verbascum thapsus</i> L.                          | Yuk tsin (Am), Mullein (Eng), Gunupuchh (Km), Gan puchhre (Np)                                             | Root extract is useful in constipation and urine problem. Leaf, stem and flower juice is taken in blood disorder, cuts and wounds.                                          | J83  | D, J, Mus |
| Solanaceae       | <i>Datura stramonium</i> L.                          | Mdak (Am), Thorn apple (Eng), Dhaturu (Np), Dhustura (Sn)                                                  | Extract of leaves, flowers and fruits is used in fever, pain and rheumatism.                                                                                                | D32  | D, J      |
| Solanaceae       | <i>Solanum nigrum</i> L.                             | Black nightshade (Eng), Kalo bhindo (Np)                                                                   | Powder of root is taken in intestinal pain.                                                                                                                                 | J74  | J, Mus    |
| Taxaceae         | <i>Taxus wallichiana</i> Zucc.                       | Sanga sung (Am), Himalayan yew (Eng), Kandeloto (Km), Loth salla (Np)                                      | Leaf extract is applied in skin diseases and cancer. It is also used in asthma, bronchitis, joint problem and muscular pain.                                                | D77  | D, H      |
| Umbelliferae     | <i>Cortia depressa</i> (D. Don) C. Norman            | Tunak yungwa (Am), Njara (Km),                                                                             | Root paste is taken in kidney problem, constipation,                                                                                                                        | M27  | D, Mus    |



|               |                                                              |                                                                                                                    |                                                                                                                                                                           |      |           |
|---------------|--------------------------------------------------------------|--------------------------------------------------------------------------------------------------------------------|---------------------------------------------------------------------------------------------------------------------------------------------------------------------------|------|-----------|
|               |                                                              | Nigale sag (Np)                                                                                                    | throat pain and gout.                                                                                                                                                     |      |           |
| Umbelliferae  | <i>Heracleum candicans</i><br>Wall. ex DC.                   | Tukar (Am),<br>Sukar, Chhetaro<br>(Km)                                                                             | Root powder is useful for<br>earache. Root extract is used<br>in joint pain, bleeding and<br>leprosy.                                                                     | M42  | D, Mus    |
| Umbelliferae  | <i>Selinum tenuifolium</i><br>Wall.                          | Chawa, Chella,<br>Tunak (Am),<br>Ragwort (Eng),<br>Bhutkesh,<br>Bhatauri (Np),<br>Kanthaparna (Sn),<br>Rhuji (She) | Root decoction is used in<br>diarrhea, cuts, wounds,<br>stomachache and eye<br>problem.                                                                                   | D709 | D, H, Mus |
| Umbelliferae  | <i>Pleurospermum</i><br><i>dentatum</i> (DC.) C.B.<br>Clarke | Gannaino (Np)                                                                                                      | Root powder is taken with<br>warm water in indigestion. It<br>is taken orally for bile<br>disorders and gall stone.                                                       | J61  | H, J      |
| Urticaceae    | <i>Girardinia diversifolia</i><br>(Link) Friis               | Chapo (Am),<br>Himalayan nettle<br>(Eng), Alle sisno<br>(Km, Np)                                                   | Root paste is applied on<br>swelling.                                                                                                                                     | J41  | D, H, J   |
| Urticaceae    | <i>Urtica dioica</i> L.                                      | Stinging nettle<br>(Eng), Polo (Km),<br>Sisnoo (Np)                                                                | Root juice is taken in skin<br>disease and kidney<br>problems. It is also used as<br>diuretics, anthelmintic and<br>vegetable.                                            | D81  | D, H, Mus |
| Valerianaceae | <i>Nardostachys</i><br><i>grandiflora</i> DC.                | Drak poe (Am),<br>Spikenard (Eng),<br>Bhulte (Km),<br>Jatamasi (Np),<br>Pangbu (She),<br>Gandhamasi (Sn)           | Rhizome decoction is<br>applied in diuretics,<br>indigestion, leprosy,<br>epilepsy, fever and<br>constipation. Leaves are<br>chewed in headache and<br>altitude sickness. | D710 | D, H, J   |
| Valerianaceae | <i>Valeriana jatamansii</i><br>Jones                         | Nak poe (Am),<br>Valerian (Eng),<br>Samayo (Km),<br>Sugandhwal (Np),<br>Tagara (Sn)                                | Rhizome paste is applied in<br>headache, sore throat,<br>indigestion and shock.<br>Shoot juice is useful in eye<br>problem.                                               | D82  | D, H, J   |

|               |                             |                                                             |                                                                       |     |      |
|---------------|-----------------------------|-------------------------------------------------------------|-----------------------------------------------------------------------|-----|------|
| Zingiberaceae | <i>Roscoea alpina</i> Royle | Wangla nempo (Am), Bhadauri, Kakoli, Nakali panchaunle (Np) | Root decoction is used as tonic. It is applied in headache and fever. | J70 | D, J |
|---------------|-----------------------------|-------------------------------------------------------------|-----------------------------------------------------------------------|-----|------|

Few vernacular names were taken from IUCN Nepal<sup>3,5</sup>, Lama et al<sup>41</sup> and Ghimire et al<sup>49</sup>

Am = Amchi, Eng = English, Km = Kham, Np = Nepali, She = Sherpa, Sn = Sanskrit,

D = Dolpa District, H = Humla District, J = Jumla District and Mus = Mustang District
